# Supplementary material for: More patient-centered care, better healthcare: the association between patient-centered care and healthcare outcomes in inpatients
Source: Front Public Health. 2023 Oct 19;11:1148277. doi: 10.3389/fpubh.2023.1148277 (PMC10620693; doi:10.3389/fpubh.2023.1148277)
Supplement: Supplementary file 1 [file Table_1.DOCX]

|  | | | | | | |
| --- | --- | --- | --- | --- | --- | --- |
|  | Dependent variable: | | | | | |
|  |  | | | | | |
|  | PHS | MHS | PSN | PHS | MHS | PSN |
|  | (1) | (2) | (3) | (4) | (5) | (6) |
|  | | | | | | |
| PCC-6 | 2.578*** | 4.513*** | 8.715*** | 4.413*** | 10.045*** | 10.270*** |
|  | (0.109) | (0.089) | (0.216) | (0.113) | (0.145) | (0.084) |
| Age | 0.979*** | 0.987*** | 0.971*** | 0.979*** | 0.987*** | 0.970*** |
|  | (0.007) | (0.006) | (0.027) | (0.007) | (0.006) | (0.026) |
| Hukou | 0.712*** | 0.673*** | 1.647** | 14.699*** | 48.650*** | 4.466*** |
|  | (0.050) | (0.082) | (0.694) | (0.526) | (0.555) | (0.610) |
| Income | 1.018*** | 1.177*** | 0.804*** | 1.021*** | 1.183*** | 0.814*** |
|  | (0.055) | (0.012) | (0.145) | (0.054) | (0.013) | (0.155) |
| Gender | 0.951*** | 0.993*** | 0.925*** | 0.949*** | 1.000*** | 0.921*** |
|  | (0.131) | (0.053) | (0.204) | (0.128) | (0.050) | (0.210) |
| Martial status | 0.772* | 0.733** | 3.443*** | 0.744* | 0.705** | 3.567*** |
|  | (0.396) | (0.317) | (0.324) | (0.401) | (0.317) | (0.295) |
| Education | 0.960*** | 1.075*** | 0.934*** | 0.957*** | 1.070*** | 0.914*** |
|  | (0.016) | (0.023) | (0.360) | (0.016) | (0.024) | (0.349) |
| Health insurance | 1.532*** | 1.236*** | 0.624 | 1.610*** | 1.349*** | 0.660 |
|  | (0.208) | (0.228) | (0.627) | (0.205) | (0.251) | (0.684) |
| PCC-6 * Residence |  |  |  | 0.507*** | 0.367*** | 0.768*** |
|  |  |  |  | (0.120) | (0.142) | (0.226) |
| Constant | 0.209 | 0.020 | 0.047 | 0.020 | 0.001 | 0.028 |
|  | (0.552) | (0.362) | (0.928) | (0.450) | (0.632) | (1.285) |
|  | | | | | | |
| Observations | 5,199 | 5,199 | 5,199 | 5,199 | 5,199 | 5,199 |
| Adj-R2 | 0.117 | 0.133 | 0.200 | 0.121 | 0.139 | 0.201 |
|  | | | | | | |
| Note: | *p**p***p<0.01 | | | | | |
